# Supplementary material for: Regulatory role of miR-142-3p on the functional hepatic cancer stem cell marker CD133
Source: PubMed Central journal article supplement (PMC4170635; doi:10.18632/oncotarget.2167), 2014-07-05
Supplement: oncotarget-05-5725-s001.pdf [file oncotarget-05-5725-s001.pdf]

## Regulatory role of miR-142-3p on the functional hepatic cancer stem cell marker CD133

### Supplementary Information

**Supplementary Table 1: Clinicopathological correlation of miR-142-3p expression in HCC.**

| Variable                                | n  | HCC                     |                          | p value |
|-----------------------------------------|----|-------------------------|--------------------------|---------|
|                                         |    | Low miR-142-3p<br>n (%) | High miR-142-3p<br>n (%) |         |
| <b>Gender</b>                           |    |                         |                          |         |
| Male                                    | 34 | 18 (44.4)               | 16 (55.6)                | 0.721   |
| Female                                  | 9  | 4 (52.9)                | 5 (47.1)                 |         |
| <b>Age</b>                              |    |                         |                          |         |
| ≥50                                     | 24 | 11 (57.9)               | 13 (42.1)                | 0.432   |
| <50                                     | 19 | 11 (45.8)               | 8 (54.2)                 |         |
| <b>TNM Stage</b>                        |    |                         |                          |         |
| I and II                                | 30 | 16 (53.3)               | 14 (46.7)                | 0.665   |
| III (A, B, C)                           | 13 | 6 (46.2)                | 7 (53.8)                 |         |
| <b>Tumor Number</b>                     |    |                         |                          |         |
| 1                                       | 32 | 16 (50)                 | 16 (50)                  | 0.795   |
| ≥2                                      | 11 | 6 (54.5)                | 5 (45.5)                 |         |
| <b>Tumor Size <sup>2</sup></b>          |    |                         |                          |         |
| <5                                      | 13 | 7 (53.8)                | 6 (46.2)                 | 0.817   |
| ≥5                                      | 30 | 15 (50)                 | 15 (50)                  |         |
| <b>HBV Surface Antigen <sup>1</sup></b> |    |                         |                          |         |
| Positive                                | 34 | 18 (52.9)               | 16 (47.1)                | 1.000   |
| Negative                                | 8  | 4 (50)                  | 4 (50)                   |         |
| <b>Differentiation <sup>1</sup></b>     |    |                         |                          |         |
| Well                                    | 3  | 0 (0)                   | 3 (100)                  | 0.256   |
| Moderate                                | 20 | 11 (55)                 | 9 (45)                   |         |
| Poor                                    | 19 | 11 (57.9)               | 8 (42.1)                 |         |
| <b>Adjacent Organ Invasion</b>          |    |                         |                          |         |
| Positive                                | 6  | 1 (16.7)                | 5 (83.3)                 | 0.095   |
| Negative                                | 37 | 21 (56.8)               | 16 (43.2)                |         |
| <b>Vascular Invasion</b>                |    |                         |                          |         |
| Yes                                     | 8  | 3 (37.5)                | 5 (62.5)                 | 0.457   |
| No                                      | 35 | 19 (54.3)               | 16 (45.7)                |         |
| <b>Cirrhosis <sup>1</sup></b>           |    |                         |                          |         |
| No                                      | 11 | 6 (54.5)                | 5 (45.5)                 | 1.000   |
| Mild                                    | 17 | 9 (52.9)                | 8 (47.1)                 |         |
| Moderate                                | 12 | 6 (50)                  | 6 (50)                   |         |
| Severe                                  | 2  | 1 (50)                  | 1 (50)                   |         |
| <b>Capsule</b>                          |    |                         |                          |         |
| Complete                                | 12 | 7 (58.3)                | 5 (41.7)                 | 0.721   |
| Incomplete                              | 14 | 6 (42.9)                | 8 (57.1)                 |         |
| No                                      | 17 | 9 (52.9)                | 8 (47.1)                 |         |

<sup>1</sup> Partial data not available. Statistics based on available data only.

<sup>2</sup> Measured by the length of the largest tumor nodule.

**Supplementary Table 2: Primer sequences for luciferase reporter assays.**

|                       | <b>Forward Primer (5' – 3')</b> | <b>Reverse Primer (5' – 3')</b> |
|-----------------------|---------------------------------|---------------------------------|
| 3'UTR CD133 sense     | ATACGCGTAAGGCAACGGCACCA         | CGAAGCTTTGTAAACTGGTGTGTGT       |
| 3'UTR CD133 antisense | GGAAGCTTAAGGCAACGGCACCA         | AAACGCGTTGTAAACTGGTGTGTGT       |
